# Supplementary material
Source: PubMed Central journal article supplement (PMC7880630)
Supplement: 40699_2020_3926_MOESM1_ESM.pdf [file 40699_2020_3926_MOESM1_ESM.pdf]

## Supplementary material

**Supplementary table 1.** Demographic features of study participants.

|                                                                     |             |
|---------------------------------------------------------------------|-------------|
| <b>Characteristic</b>                                               |             |
| <b>Female, <i>n</i> (%)</b>                                         | 284 (84.02) |
| <b>Age, (years) (mean ± SD)</b>                                     | 44.99±14.58 |
| <b>BMI, kg/m<sup>2</sup>, (mean ± SD)</b>                           | 21.93±3.92  |
| <b>Smoker, <i>n</i> (%)</b>                                         | 20 (5.92)   |
| <b>Type, <i>n</i> (%)</b>                                           | 231 (68.14) |
| LE                                                                  | 107 (31.65) |
| RA                                                                  |             |
| <b>Subgroup of LE, <i>n</i> (%)</b>                                 | 119 (51.51) |
| Systematic LE                                                       | 15 (6.49)   |
| Lupus nephritis                                                     | 14 (6.06)   |
| Lupus pneumonitis                                                   | 31 (13.44)  |
| Lupus encephalitis                                                  | 76 (32.90)  |
| Blood system                                                        | 7 (3.03)    |
| Others                                                              |             |
| Cutaneous LE                                                        |             |
| <b>Concomitant diseases, <i>n</i> (%)</b>                           | 259 (76.62) |
| Hypertension                                                        | 78 (23.07)  |
| Diabetes                                                            | 16 (4.73)   |
| Cardiovascular disease                                              | 19 (5.62)   |
| Chronic pulmonary disease                                           | 46 (13.60)  |
| Malignancy                                                          | 4 (1.18)    |
| <b>Discontinuation of medication, <i>n</i> (%)</b>                  | 32 (9.46)   |
| Discontinuation due to COVID-19                                     | 15 (4.43)   |
| Discontinuation due to adverse effect                               | 8 (2.37)    |
| Discontinuation due to remission                                    | 8 (2.37)    |
| Others                                                              | 1 (0.29)    |
| <b>Clinical outcome, (%)</b>                                        |             |
| Complete remission                                                  | 138 (40.8)  |
| Partial remission                                                   | 149 (44.08) |
| Stable disease                                                      | 14 (4.14)   |
| Progressive disease                                                 | 30 (8.87)   |
| Death                                                               | 7 (2.07)    |
| <b>Recent residential and travel history in Wuhan, <i>n</i> (%)</b> | 174 (51.47) |

|                                                            |              |
|------------------------------------------------------------|--------------|
| <b>Patients' location of residence, <i>n</i> (%)</b>       | 99 (29.73%)  |
| Wuhan (the capital of Hubei province)                      | 234 (70.27%) |
| Other cities of Hubei province                             | 5 (1.48%)    |
| Other provinces                                            |              |
| <b>Close contact with a COVID-19 patient, <i>n</i> (%)</b> | 2 (0.59)     |
| <b>Potential COVID-19 exposure, <i>n</i> (%)</b>           | 17 (5.03)    |
| <b>Diagnosis of COVID-19, <i>n</i> (%)</b>                 | 3 (0.88)     |

HCQ: hydroxychloroquine; BMI: body mass index; LE: lupus erythematosus; RA: rheumatoid arthritis.

|                                           | <b>Exposed to HCQ<br/>n=211</b> | <b>Not exposed to<br/>HCQ<br/>n=127</b> | <b>p</b>         |
|-------------------------------------------|---------------------------------|-----------------------------------------|------------------|
| <b>Female, n (%)</b>                      | 179 (84.83)                     | 105 (82.67)                             | 0.647            |
| <b>Age, (years) (mean ± SD)</b>           | 42.33 ± 14.61                   | 49.39 ± 13.45                           | <b>&lt;0.001</b> |
| <b>BMI, kg/m<sup>2</sup>, (mean ± SD)</b> | 21.79 ± 3.41                    | 22.15 ± 4.65                            | 0.591            |
| <b>Smoker, n (%)</b>                      | 13 (6.25)                       | 7 (5.60)                                | 1.000            |
| <b>Type, n (%)</b>                        |                                 |                                         |                  |
| LE                                        | 165 (78.2)                      | 66 (51.97)                              | <b>&lt;0.001</b> |
| RA                                        | 46 (21.80)                      | 61 (48.03)                              |                  |
| <b>Concomitant diseases, n (%)</b>        | 154 (74.40)                     | 105 (84.68)                             | <b>0.029</b>     |
|                                           |                                 | 8                                       |                  |
| <b>Medication history, n (%)</b>          | 188 (89.10)                     | 4 (66.14)                               | <b>&lt;0.001</b> |
| Glucocorticoids                           | 11 (5.21)                       | 10 (7.87)                               | 0.357            |
| Methotrexate                              | 8 (3.79)                        | 4 (3.15)                                | 1.000            |
| Cyclosporine                              | 62 (29.38)                      | 28 (22.05)                              | 0.163            |
| Mycophenolate Mofetil                     | 23 (10.90)                      | 11 (8.67)                               | 0.578            |
| Tacrolimus                                | 5 (2.37)                        | 1 (0.79)                                | 0.416            |
| Thalidomide                               | 1 (0.47)                        | 0 (0.00)                                | 1.000            |
| Dapsone                                   | 9 (4.27)                        | 12 (9.45)                               | 0.065            |
| Leflunomide                               | 3 (1.42)                        | 0 (0.00)                                | 0.294            |
| Sulfasalazine                             | 5 (2.37)                        | 1 (0.79)                                | 0.416            |
| Iguratimod                                | 1 (0.47)                        | 1 (0.79)                                | 1.000            |
| Tripterygium wilfordii                    | 69 (32.70)                      | 29 (22.83)                              | 0.063            |
| Total glucosides of paeony                | 4 (1.90)                        | 7 (5.51)                                | 0.110            |
| Biologics                                 |                                 |                                         |                  |
| <b>Recently travelled to Wuhan, n (%)</b> | 110 (52.13)                     | 64 (50.40)                              | 0.822            |
| <b>Diagnosis of COVID-19, n (%)</b>       | 2 (0.96)                        | 1 (0.84)                                | 1.000            |

**Supplementary table 2.** Demographic features of study participants, grouped by hydroxychloroquine exposure.

HCQ: hydroxychloroquine; BMI: body mass index; LE: lupus erythematosus; RA: rheumatoid arthritis.
